# Supplementary material for: Genome-Wide Screening for Novel Candidate Virulence Related Response Regulator Genes in Xanthomonas oryzae pv. oryzicola
Source: Front Microbiol. 2018 Aug 7;9:1789. doi: 10.3389/fmicb.2018.01789 (PMC6090019; doi:10.3389/fmicb.2018.01789)
Supplement: TABLE S3 — The phenotypes of RR mutants of Xoc GX01. [file Table_3.XLSX]

## Sheet: S3.The phenotypes of RR mutant
Supplimentary Table S3. The phenotypes for all RR gene mutants of Xoc GX01
Xoc GX01 ID	Gene name	SDS tolerance	Osmolarity stress	H2O2 stress	Heavy metal (CdSO4) stress	virulence	EPS	Swarming	Extracellular enzymes
GX_XOC0263	ntrC, glnG	-	H	H	H	-	-	-	-
GX_XOC0286	ntrC family	-	-	-	-	-	-	-	H
GX_XOC0329	narL family	L	-	L	-	-	-	-	-
GX_XOC0538		-	L	L	H	-	L	L	-
GX_XOC0615	algR	-	-	H	-	-	-	-	-
GX_XOC0677	sreR	L	L	L	L	-	-	H	L
GX_XOC0722	ompR family	L	-	-	H	L	-	-	-
GX_XOC0758	kdpE	-	H	-	-	-	-	-	-
GX_XOC0833	colR, detR	-	L	H	L	-	-	-	-
GX_XOC0882	cheY family	-	-	-	-	-	L	L	-
GX_XOC1041	phoB	H	H	L	-	L	-	-	L
GX_XOC1120	pilH	-	-	-	-	-	-	-	-
GX_XOC1197	colR, raxR	-	-	-	-	-	-	-	-
GX_XOC1206	narL family	L	-	H	-	L	-	-	-
GX_XOC1459	cheB1	L	-	L	-	L	-	-	-
GX_XOC1461	vieA1	L	L	-	H	-	-	-	-
GX_XOC1513	adeR	-	-	-	-	-	L	L	-
GX_XOC1838	pcrR	-	-	H	L	-	-	-	-
GX_XOC1848	pleD	-	H	-	-	-	-	-	-
GX_XOC2023	regA	H	H	H	-	-	-	-	-
GX_XOC2103	rpfG	L	L	-	-	L	-	-	L
GX_XOC2117	cheB2	-	-	-	-	L	-	-	-
GX_XOC2142	cheY	H	H	L	-	-	-	H	L
GX_XOC2163	cheY	H	H	H	H	-	-	H	-
GX_XOC2201	vemR	H	H	-	-	L	L	L	-
GX_XOC2203	citB	-	-	-	L	-	-	-	-
GX_XOC2221	cheV	-	H	-	-	L	H	H	L
GX_XOC2227	ravR, pdeR	-	H	L	-	L	L	L	-
GX_XOC2300		-	-	-	L	-	-	-	-
GX_XOC2338	ompR, virG	-	-	-	-	L	H	H	-
GX_XOC2384	gacA	H	H	-	-	-	-	-	-
GX_XOC2451		-	L	L	L	L	-	-	L
GX_XOC2969		-	-	-	-	-	-	-	-
GX_XOC3092	pilH	L	L	-	-	-	-	-	-
GX_XOC3093	pilG	-	L	H	H	L	H	H	-
GX_XOC3121	cheY family	-	-	-	-	-	-	-	-
GX_XOC3223	hrpG	-	L	H	L	L	-	-	-
GX_XOC3288	pilR	L	-	-	L	L	-	-	-
GX_XOC3305	colR, vgrR	H	-	-	L	L	-	-	-
GX_XOC3382	qseB	L	-	L	L	-	-	-	-
GX_XOC3485	gsmR	-	-	-	L	-	-	-	-
GX_XOC3522		L	-	H	L	-	L	L	-
GX_XOC3525	tctD	H	H	H	L	L	-	-	H
GX_XOC3684	hpaR2	H	H	L	L	L	-	-	L
GX_XOC3745	ompR family	-	L	-	L	-	-	-	-
GX_XOC3771	lytTR family	-	-	-	L	-	-	-	-
GX_XOC3778		H	L	H	-	-	-	-	-
GX_XOC3779	xerR, xibR, xbmR	-	-	H	-	-	-	-	H
GX_XOC3947	vieA2	-	-	-	L	-	-	-	-
GX_XOC4109	smeR, baeR	L	H	L	L	-	-	L	L
Note: H: significantly increased, L: significantly decreased -: No significant differences
